# Supplementary material for: Efficient Removal of Hexavalent Chromium (Cr(VI)) from Wastewater Using Amide-Modified Biochar
Source: MDPI journal article supplement (doi:10.3390/molecules28135146), 2023-06-30
Supplement: s1 [file s1]

## Supplementary Materials

# Efficient removal of Cr (VI) from wastewater using amide-modified biochar

Ashraf Ali <sup>1,\*</sup>, Sarah Alharthi <sup>2,3</sup>, Nora Hamad Al-Shaalan <sup>4</sup>, Alia Naz <sup>5</sup> and Hua-Jun Shawn Fan <sup>6</sup>

<sup>1</sup> Department of Chemistry, Faculty of Physical & Applied Sciences, The University of Haripur, 22620 Pakistan

<sup>2</sup> Center of Advanced Research in Science and Technology, Taif University, P.O. Box 11099, Taif 21944, Saudi Arabia

<sup>3</sup> Department of Chemistry, College of Science, Taif University, P.O. Box 11099, Taif 21944, Saudi Arabia

<sup>4</sup> Department of Chemistry, College of Science, Princess Nourah bint Abdulrahman University, P.O. Box 84428, Riyadh 11671, Saudi Arabia

<sup>5</sup> Department of Environmental Science, Faculty of Physical & Applied Sciences, The University of Haripur, 22620 Pakistan; aliaawkum@gmail.com

<sup>6</sup> College of Chemical Engineering, Sichuan University of Science and Engineering, Zigong city, Sichuan Province, PR China

\* Correspondence: ashraf.ali@uoh.edu.pk; Tel.: (+923471214422)

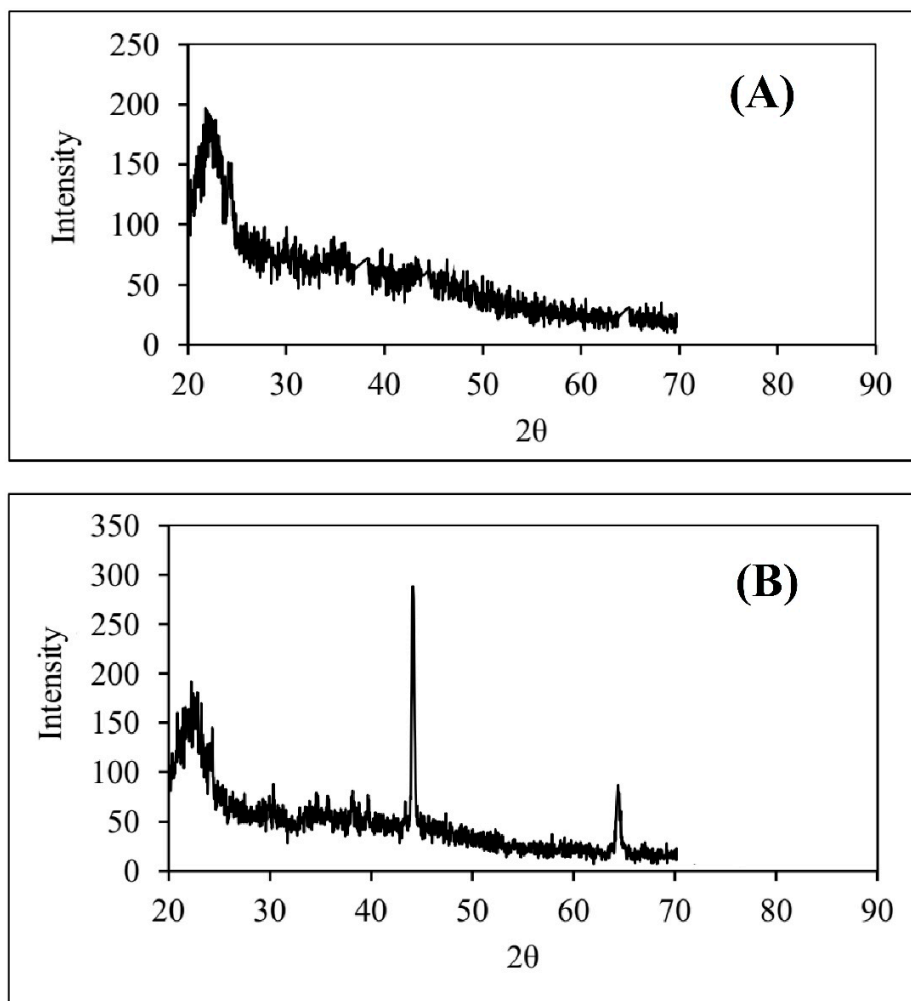

**Figure S1.** XRD analysis of chemically modified biochar before Cr(VI) adsorption (A) and after Cr(VI) adsorption (B)

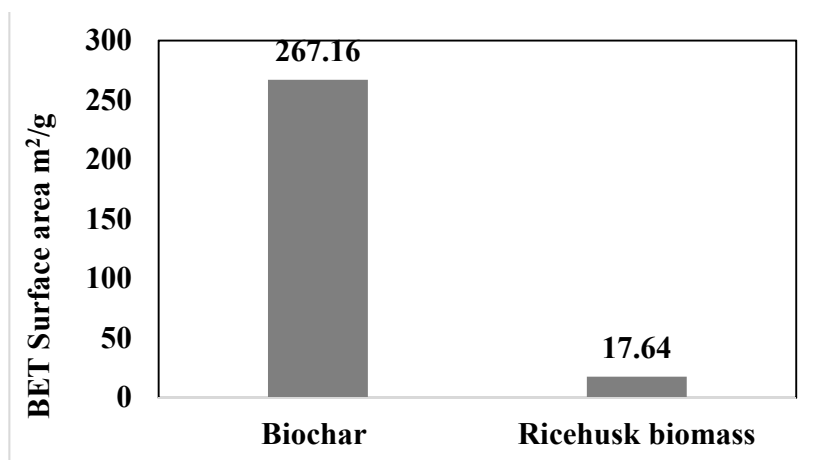

Figure S2. BET surface area of ricehusk biomass and biochar.

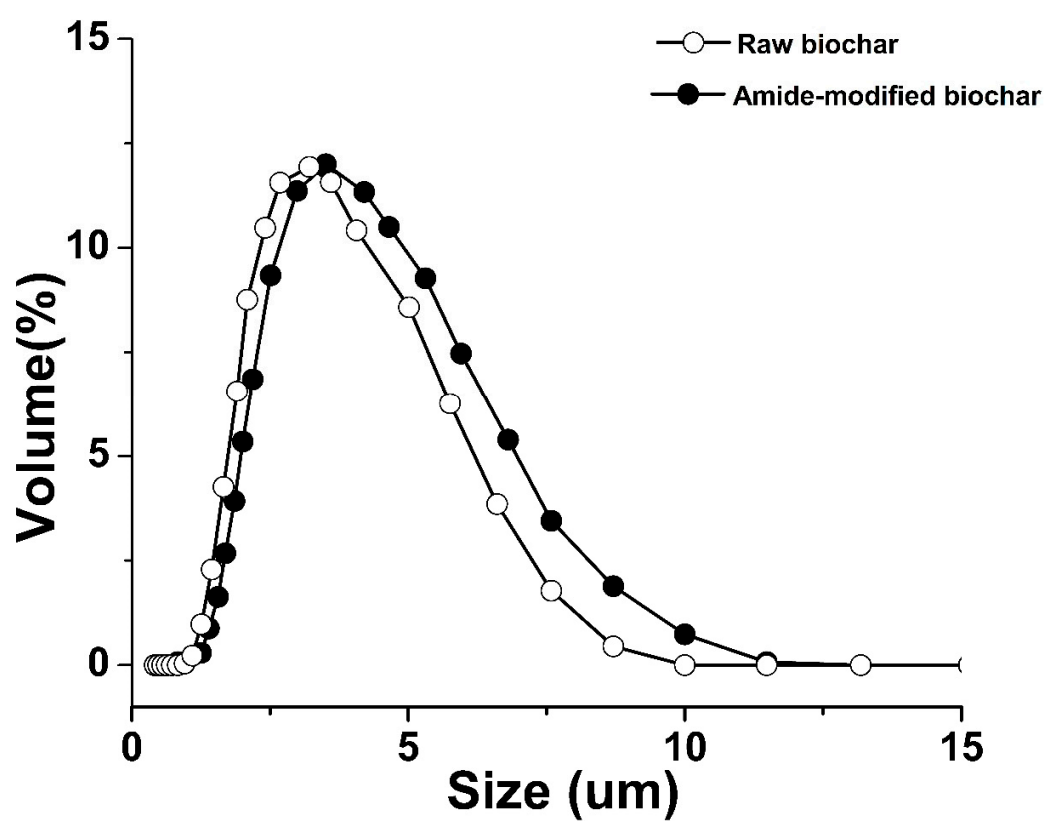

Figure S3. Volume based particle size distribution of raw and chemically modified biochar.

**Table S1.** Physico-chemical characteristics of industrial wastewater.

| Parameters              | Values      |
|-------------------------|-------------|
| pH                      | 7.3 ± 0.4   |
| BOD (mg/l)              | 897 ± 150   |
| COD (mg/l)              | 1330 ± 470  |
| TDS (mg/l)              | 998 ± 223   |
| Conductivity (µS/cm)    | 2790 ± 330  |
| DCO (mg/l)              | 549.5 ± 280 |
| DBO <sub>5</sub> (mg/l) | 363 ± 210   |
| Hardness                | 5.92 ± 2.15 |
| Salinity (g/l)          | 1.3 ± 0.4   |
